# Supplementary material
Source: PubMed Central journal article supplement (PMC2788831)
Supplement: supp_M109.028324_supplemental.pdf [file supp_M109.028324_supplemental.pdf]

SUPPLEMENTAL TABLE

| Affymatrix ID                                   | Gene Symbol | Fold change    | Signal intensity |        |        |         |         |         |
|-------------------------------------------------|-------------|----------------|------------------|--------|--------|---------|---------|---------|
|                                                 |             | RST2 vs. Daudi | RST2_1           | RST2_2 | RST2_3 | Daudi_1 | Daudi_2 | Daudi_3 |
| <b><i>Genes downregulated in RST2 cells</i></b> |             |                |                  |        |        |         |         |         |
| 219577_s_at                                     | ABCA7       | -2.2           | 81               | 51     | 75     | 148     | 145     | 154     |
| 212286_at                                       | ANKRD12     | -3.1           | 15               | 23     | 37     | 77      | 68      | 86      |
| 212280_x_at                                     | Apg4B       | -2.9           | 93               | 55     | 38     | 176     | 186     | 171     |
| 221653_x_at                                     | APOL2       | -4.3           | 21               | 27     | 25     | 102     | 130     | 80      |
| 207722_s_at                                     | BTBD2       | -3.0           | 65               | 85     | 26     | 178     | 149     | 211     |
| 211922_s_at                                     | CAT         | -2.0           | 181              | 209    | 218    | 371     | 438     | 425     |
| 202770_s_at                                     | CCNG2       | -2.0           | 156              | 240    | 251    | 330     | 603     | 393     |
| 203522_at                                       | CCS         | -2.6           | 35               | 57     | 18     | 136     | 93      | 63      |
| 203493_s_at                                     | CEP57       | -2.5           | 55               | 144    | 84     | 240     | 280     | 174     |
| 218446_s_at                                     | CGI-148     | -2.4           | 62               | 39     | 58     | 125     | 148     | 101     |
| 203104_at                                       | CSF1R       | -2.8           | 136              | 169    | 72     | 440     | 433     | 192     |
| 204971_at                                       | CSTA        | -4.8           | 92               | 107    | 21     | 626     | 208     | 217     |
| 201487_at                                       | CTSC        | -2.0           | 656              | 384    | 497    | 745     | 1383    | 895     |
| 202969_at                                       | DYRK2       | -2.0           | 566              | 298    | 444    | 757     | 1136    | 760     |
| 201135_at                                       | ECHS1       | -2.7           | 416              | 341    | 385    | 1007    | 918     | 1115    |
| 203646_at                                       | FDX1        | -2.1           | 52               | 97     | 79     | 132     | 213     | 134     |
| 218298_s_at                                     | FLJ20950    | -2.1           | 186              | 180    | 138    | 301     | 440     | 320     |
| 211829_s_at                                     | GPR30       | -2.3           | 34               | 27     | 43     | 69      | 110     | 62      |
| 212211_at                                       | GTAR        | -2.0           | 387              | 396    | 439    | 668     | 954     | 849     |
| 201833_at                                       | HDAC2       | -2.0           | 247              | 402    | 341    | 768     | 785     | 470     |
| 211530_x_at                                     | HLA-G       | -2.3           | 829              | 937    | 585    | 1877    | 2287    | 1253    |
| 221480_at                                       | HNRPD       | -2.0           | 171              | 112    | 163    | 238     | 415     | 234     |
| 208966_x_at                                     | IFI16       | -2.1           | 1480             | 1340   | 1333   | 2882    | 3341    | 2303    |
| 214453_s_at                                     | IFI44       | -10.0          | 137              | 93     | 47     | 1169    | 1167    | 427     |
| 204439_at                                       | IFI44L      | -24.5          | 103              | 11     | 5      | 1475    | 968     | 469     |
| 204415_at                                       | IFI6        | -7.1           | 10               | 39     | 9      | 197     | 125     | 83      |
| 203153_at                                       | IFIT1       | -39.3          | 3                | 13     | 6      | 487     | 287     | 115     |
| 204747_at                                       | IFIT4       | -2.5           | 152              | 116    | 136    | 511     | 276     | 219     |
| 205483_s_at                                     | ISG15       | -11.1          | 415              | 396    | 188    | 5808    | 3602    | 1715    |
| 205885_s_at                                     | ITGA4       | -2.5           | 83               | 71     | 156    | 209     | 328     | 231     |
| 212475_at                                       | KIAA0241    | -3.0           | 28               | 96     | 27     | 121     | 140     | 185     |
| 212428_at                                       | KIAA0368    | -2.5           | 100              | 138    | 175    | 204     | 396     | 420     |
| 212311_at                                       | KIAA0746    | -2.2           | 554              | 598    | 667    | 1330    | 1267    | 1332    |
| 217933_s_at                                     | LAP3        | -2.3           | 907              | 695    | 1218   | 1710    | 2994    | 1680    |

|             |         |       |     |     |     |      |      |      |
|-------------|---------|-------|-----|-----|-----|------|------|------|
| 35160_at    | LDB1    | -2.1  | 122 | 96  | 67  | 208  | 243  | 134  |
| 201186_at   | LRPAP1  | -3.2  | 47  | 28  | 82  | 120  | 205  | 184  |
| 200796_s_at | MCL1    | -2.3  | 107 | 160 | 145 | 240  | 338  | 368  |
| 36830_at    | MIPEP   | -3.8  | 17  | 22  | 39  | 95   | 102  | 102  |
| 205395_s_at | MRE11A  | -2.3  | 146 | 112 | 131 | 267  | 356  | 256  |
| 203061_s_at | NFBD1   | -3.2  | 52  | 44  | 57  | 142  | 163  | 188  |
| 201502_s_at | NFKBIA  | -2.0  | 270 | 557 | 244 | 999  | 535  | 602  |
| 203964_at   | NMI     | -2.7  | 115 | 106 | 142 | 385  | 372  | 224  |
| 206023_at   | NMU     | -2.5  | 368 | 278 | 428 | 1133 | 622  | 888  |
| 202869_at   | OAS1    | -3.1  | 268 | 314 | 188 | 1099 | 839  | 432  |
| 204972_at   | OAS2    | -4.4  | 288 | 371 | 295 | 1846 | 1686 | 712  |
| 204300_at   | PET112L | -2.0  | 71  | 70  | 78  | 165  | 156  | 106  |
| 201120_s_at | PGRMC1  | -2.0  | 180 | 173 | 245 | 329  | 490  | 381  |
| 213227_at   | PGRMC2  | -2.3  | 74  | 38  | 83  | 152  | 185  | 120  |
| 202392_s_at | PISD    | -2.1  | 104 | 76  | 126 | 191  | 261  | 189  |
| 201191_at   | PITPN   | -2.1  | 108 | 73  | 141 | 219  | 265  | 203  |
| 217677_at   | PLEKHA2 | -2.0  | 88  | 149 | 93  | 224  | 230  | 204  |
| 211012_s_at | PML     | -16.5 | 26  | 16  | 24  | 741  | 222  | 115  |
| 204211_x_at | PRKR    | -3.5  | 226 | 289 | 122 | 1264 | 385  | 608  |
| 210251_s_at | RIPX    | -2.1  | 51  | 47  | 69  | 118  | 131  | 104  |
| 218209_s_at | RPRD1A  | -2.0  | 130 | 111 | 166 | 236  | 292  | 289  |
| 208456_s_at | RRAS2   | -2.0  | 294 | 361 | 378 | 712  | 779  | 556  |
| 216913_s_at | RRP12   | -4.1  | 23  | 17  | 64  | 69   | 182  | 176  |
| 209486_at   | SAS10   | -2.6  | 380 | 230 | 561 | 1037 | 1197 | 843  |
| 213988_s_at | SAT     | -3.7  | 113 | 50  | 72  | 493  | 209  | 172  |
| 212417_at   | SCAMP1  | -3.0  | 68  | 68  | 142 | 156  | 416  | 252  |
| 212902_at   | SEC24A  | -2.0  | 84  | 120 | 128 | 188  | 238  | 221  |
| 203155_at   | SETDB1  | -2.7  | 121 | 159 | 125 | 559  | 272  | 247  |
| 202111_at   | SLC4A2  | -3.3  | 31  | 50  | 23  | 100  | 144  | 101  |
| 212147_at   | SMG5    | -2.1  | 69  | 42  | 80  | 99   | 148  | 162  |
| 202864_s_at | SP100   | -7.2  | 46  | 24  | 11  | 247  | 224  | 110  |
| 208012_x_at | SP110   | -3.3  | 255 | 305 | 262 | 1116 | 1079 | 497  |
| 216202_s_at | SPTLC2  | -2.1  | 95  | 122 | 95  | 207  | 248  | 207  |
| 213562_s_at | SQLE    | -2.3  | 159 | 113 | 236 | 406  | 453  | 319  |
| 208803_s_at | SRP72   | -2.2  | 162 | 152 | 250 | 458  | 346  | 440  |
| 200887_s_at | STAT1   | -4.2  | 299 | 289 | 191 | 1538 | 1226 | 509  |
| 201079_at   | SYNGR2  | -2.0  | 876 | 785 | 829 | 2045 | 1344 | 1477 |
| 210875_s_at | TCF8    | -3.4  | 22  | 36  | 38  | 79   | 142  | 105  |

|                                        |               |      |      |      |      |     |      |     |
|----------------------------------------|---------------|------|------|------|------|-----|------|-----|
| 202688_at                              | TNFSF10       | -2.2 | 55   | 63   | 42   | 159 | 104  | 94  |
| 205875_s_at                            | TREX1         | -6.9 | 14   | 23   | 31   | 180 | 167  | 125 |
| 220998_s_at                            | UNC93B1       | -4.1 | 28   | 35   | 35   | 150 | 101  | 146 |
| 201797_s_at                            | VAR52         | -2.0 | 213  | 269  | 196  | 402 | 544  | 424 |
| 209053_s_at                            | WHSC1         | -2.3 | 310  | 645  | 339  | 949 | 1117 | 887 |
| 204139_x_at                            | ZNF42         | -2.5 | 45   | 37   | 44   | 88  | 87   | 144 |
| <b>Genes upregulated in RST2 cells</b> |               |      |      |      |      |     |      |     |
| 205839_s_at                            | BZRAP1        | 3.7  | 101  | 157  | 81   | 18  | 31   | 44  |
| 219012_s_at                            | C11orf30      | 4.7  | 93   | 70   | 53   | 8   | 20   | 18  |
| 205529_s_at                            | CBFA2T1       | 3.0  | 112  | 171  | 97   | 47  | 36   | 45  |
| 220227_at                              | CDH4          | 2.4  | 120  | 170  | 180  | 64  | 43   | 86  |
| 215999_at                              | CDRT1         | 2.5  | 163  | 115  | 87   | 42  | 41   | 61  |
| 214030_at                              | DKFZp667G2110 | 2.5  | 252  | 303  | 237  | 90  | 92   | 138 |
| 216835_s_at                            | DOK1          | 2.5  | 108  | 125  | 86   | 37  | 39   | 51  |
| 208138_at                              | GAS           | 2.5  | 212  | 178  | 172  | 96  | 69   | 61  |
| 220491_at                              | HAMP          | 2.9  | 134  | 95   | 94   | 33  | 45   | 34  |
| 211406_at                              | IER3IP1       | 2.4  | 480  | 413  | 402  | 153 | 157  | 229 |
| 215379_x_at                            | IGLJ3         | 2.4  | 1104 | 1005 | 1349 | 630 | 354  | 448 |
| 205889_s_at                            | JAKMIP2       | 2.5  | 71   | 88   | 76   | 38  | 22   | 35  |
| 213281_at                              | JUN           | 3.4  | 85   | 99   | 99   | 37  | 19   | 28  |
| 207723_s_at                            | KLRC3         | 2.6  | 220  | 281  | 208  | 91  | 88   | 92  |
| 215930_s_at                            | MGEA6         | 2.5  | 54   | 66   | 50   | 30  | 20   | 18  |
| 89476_r_at                             | NPEPL1        | 2.9  | 147  | 138  | 119  | 54  | 26   | 57  |
| 205549_at                              | PCP4          | 6.0  | 118  | 167  | 276  | 13  | 36   | 46  |
| 207537_at                              | PFKFB1        | 2.6  | 152  | 135  | 142  | 39  | 58   | 66  |
| 210758_at                              | PSIP1         | 3.5  | 181  | 197  | 189  | 63  | 55   | 44  |
| 221960_s_at                            | RAB2          | 2.4  | 258  | 198  | 247  | 81  | 108  | 102 |
| 206035_at                              | REL           | 2.9  | 339  | 390  | 224  | 89  | 69   | 167 |
| 205596_s_at                            | SMURF2        | 2.5  | 442  | 376  | 385  | 118 | 198  | 173 |
| 219677_at                              | SSB1          | 2.7  | 116  | 155  | 73   | 38  | 55   | 34  |
| 209228_x_at                            | TUSC3         | 2.7  | 203  | 291  | 234  | 99  | 67   | 99  |
